# Supplementary material
Source: Elsevier journal article supplement (https://rcastoragev2.blob.core.windows.net/63ad1ae1066fdfd9709ab5043e3b5ac9/mmc1.pdf)
Supplement: mmc1 [file mmc1.pdf]

**Supplemental Information**

**Cohesin Disrupts Polycomb-Dependent  
Chromosome Interactions in Embryonic Stem Cells**

**James D.P. Rhodes, Angelika Feldmann, Benjamín Hernández-Rodríguez, Noelia Díaz, Jill M. Brown, Nadezda A. Fursova, Neil P. Blackledge, Praveen Prathapan, Paula Dobrinic, Miles K. Huseyin, Aleksander Szczurek, Kai Kruse, Kim A. Nasmyth, Veronica J. Buckle, Juan M. Vaquerizas, and Robert J. Klose**

## **Supplemental Items**

**Supplementary Figure 1 - Characterisation of SCC1<sup>DEG</sup> ESCs. Related to Figure 1**

**Supplementary Figure 2 - Characterisation of RING1B<sup>DEG</sup> ESCs. Related to Figure 2**

**Supplementary Figure 3 - Cohesin removal strengthens long-range polycomb chromatin domain interactions. Related to Figure 3**

**Supplementary Figure 4 – Increased interaction between polycomb chromatin domains is not due to altered cell cycle distribution. Related to Figure 3**

**Supplementary Figure 5 - Cohesin counteracts polycomb chromatin domain interactions independently of CTCF and insulation. Related to Figure 5**

**Supplementary Figure 6 - Polycomb chromatin domain interactions are disrupted by cohesin. Related to Figure 6**

**Supplementary Figure 7 - Polycomb chromatin domain interactions are disrupted by cohesin. Related to Figure 6**

**Supplementary Figure 8 - Increased polycomb chromatin domain association in the absence of cohesin suppresses gene expression. Related to Figure 7**

**Supplementary Figure 9 – A model for disruption of polycomb chromatin domain interactions by cohesin and loop extrusion. Related to Figures 1-7**

**Supplementary Table 1 – Datasets analyzed in this study. Related to Figures 1, 4 and 5**

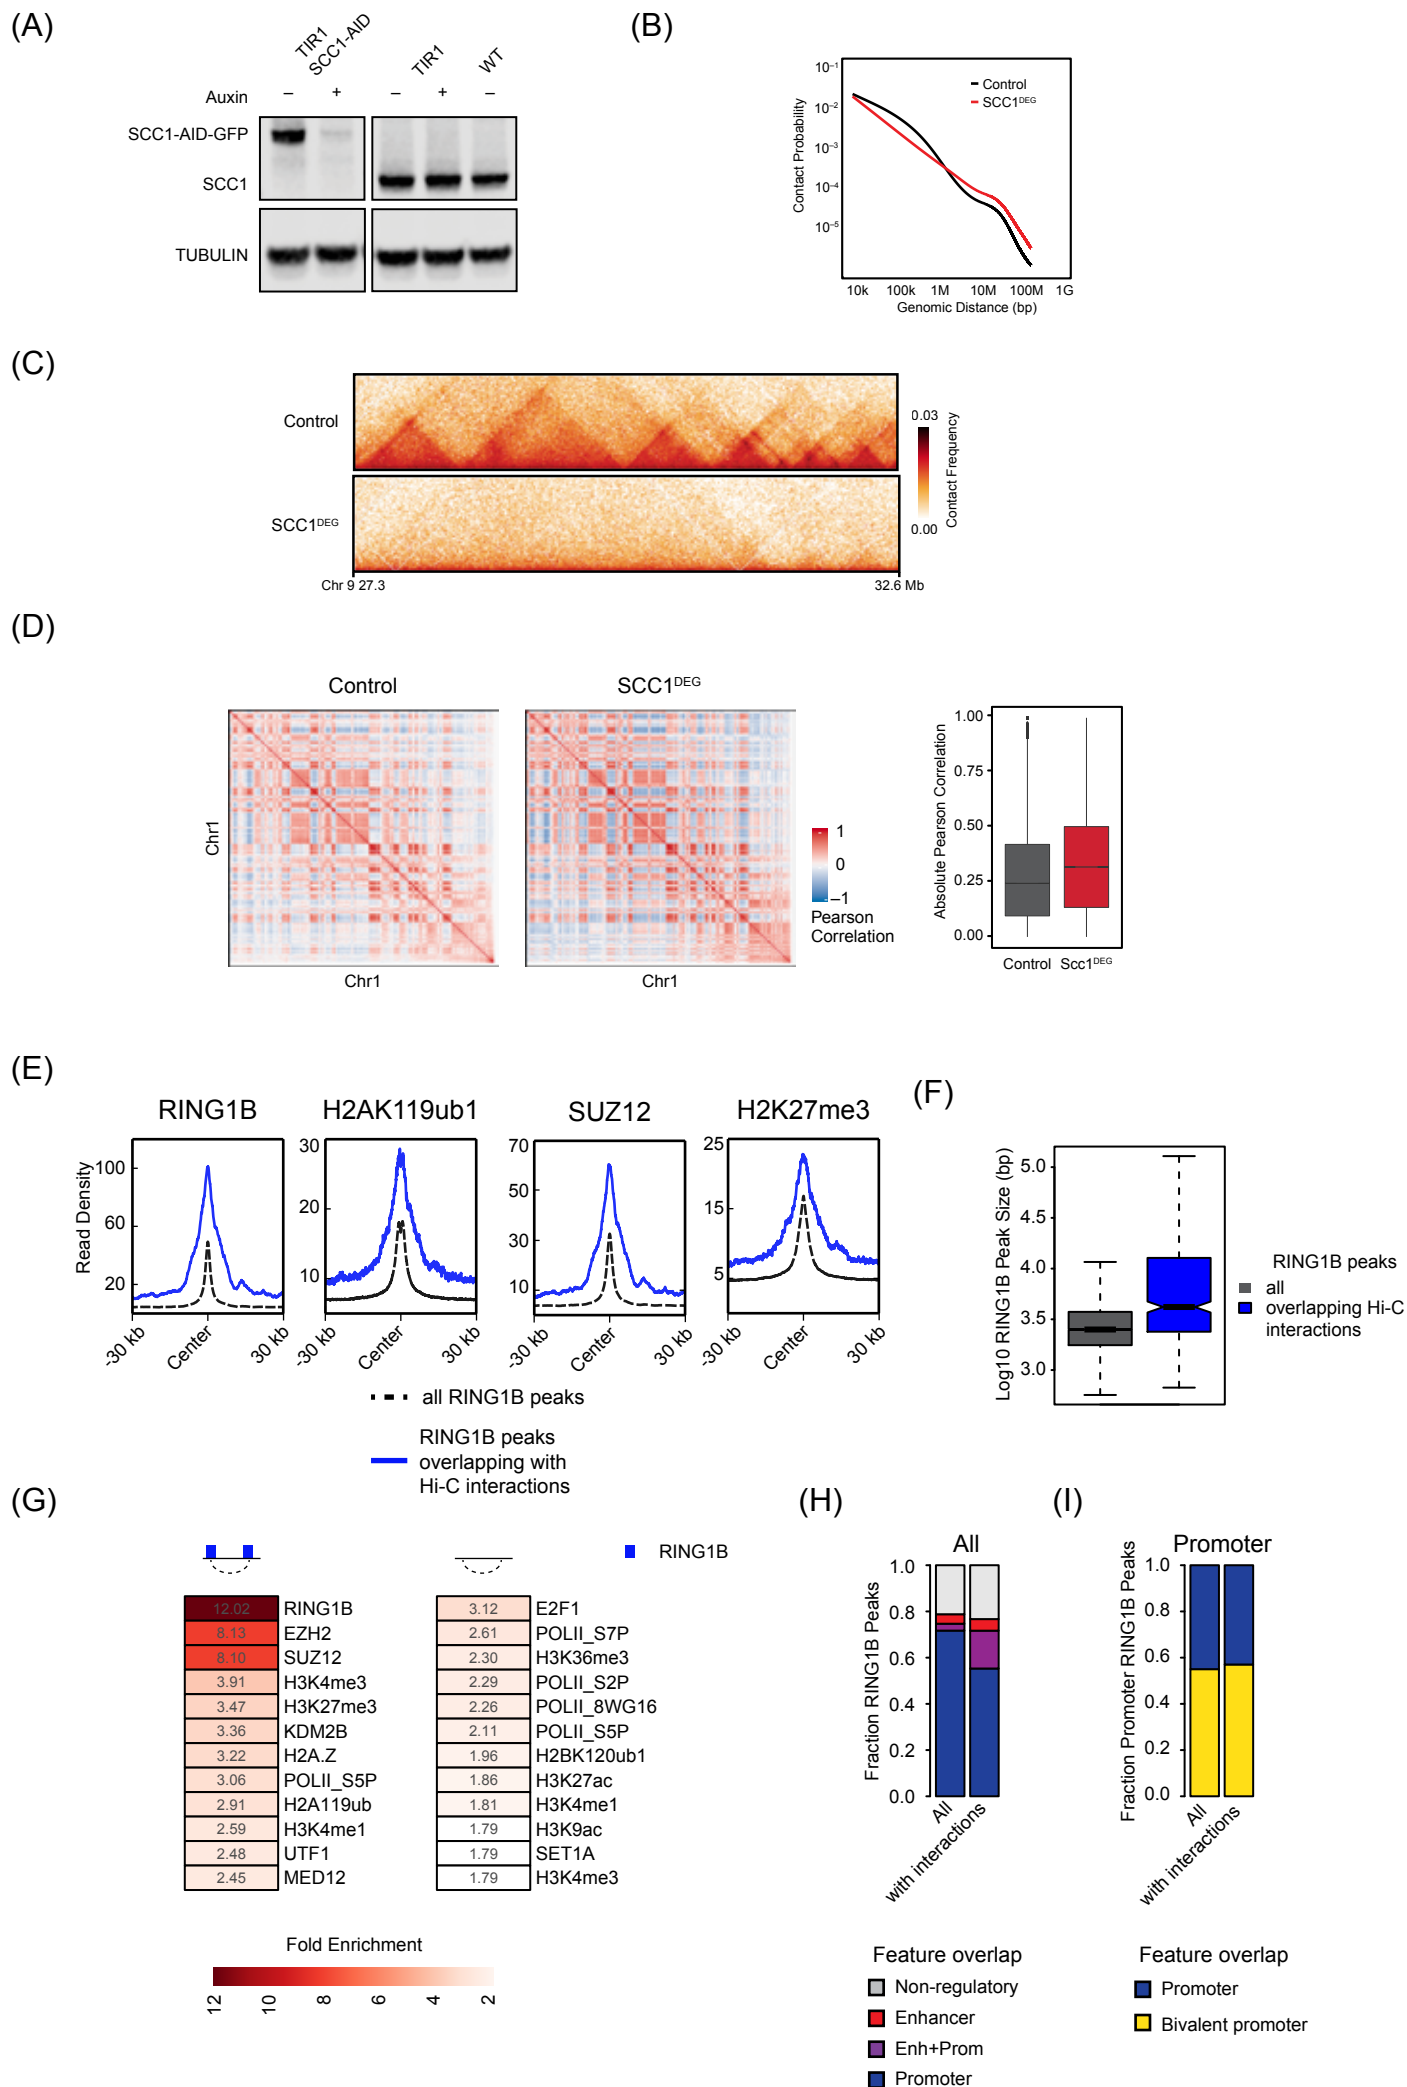

Figure S1

### Supplementary Figure 1 - Characterisation of SCC1<sup>DEG</sup> ESCs. Related to Figure 1

(A) A representative western blot for SCC1 in the TIR1 and SCC1-mAID-GFP (=SCC1<sup>DEG</sup>) cell lines  $\pm$  auxin. A wild type cell line is shown for comparison and tubulin is shown as a loading control.

(B) Genomic distance-dependent contact probability from Hi-C in Control or SCC1<sup>DEG</sup> cells.

(C) Hi-C in Control and SCC1<sup>DEG</sup> cells at 10 kb resolution.

(D) Pearson correlation coefficient of chromosome 1 from Control and SCC1<sup>DEG</sup> at 500 kb resolution (left). Bar plot of the genome-wide absolute Pearson correlation for Control and SCC1<sup>DEG</sup> (right).

(E) RING1B, H2AK119ub1, SUZ12, and H3K27me3 ChIP-seq signal metaplot at RING1B peaks overlapping with interactions that persist in the absence of cohesin (blue line) or all RING1B peaks (dashed-black line). Datasets used for this figure are indicated in the Supplementary Table S1.

(F) A box plot showing the RING1B peak size at RING1B peaks overlapping interactions that persist in the absence of cohesin (blue right) or all RING1B peaks (grey left).

(G) Enrichment of histone modifications and proteins at paired interaction sites compared to the enrichments at matched random interaction sites for interactions with RING1B peaks at both (left), or at neither (right) of the interacting sites. Fold enrichment is indicated within the heatmaps.

(H) Fraction of genomic features overlapping with all RING1B peaks or only RING1B peaks associated with cohesin-independent interactions.

(I) Fraction of all RING1B peaks or RING1B peaks associated with cohesin-independent interactions that overlap with non-bivalent (promoter) or bivalent promoters.

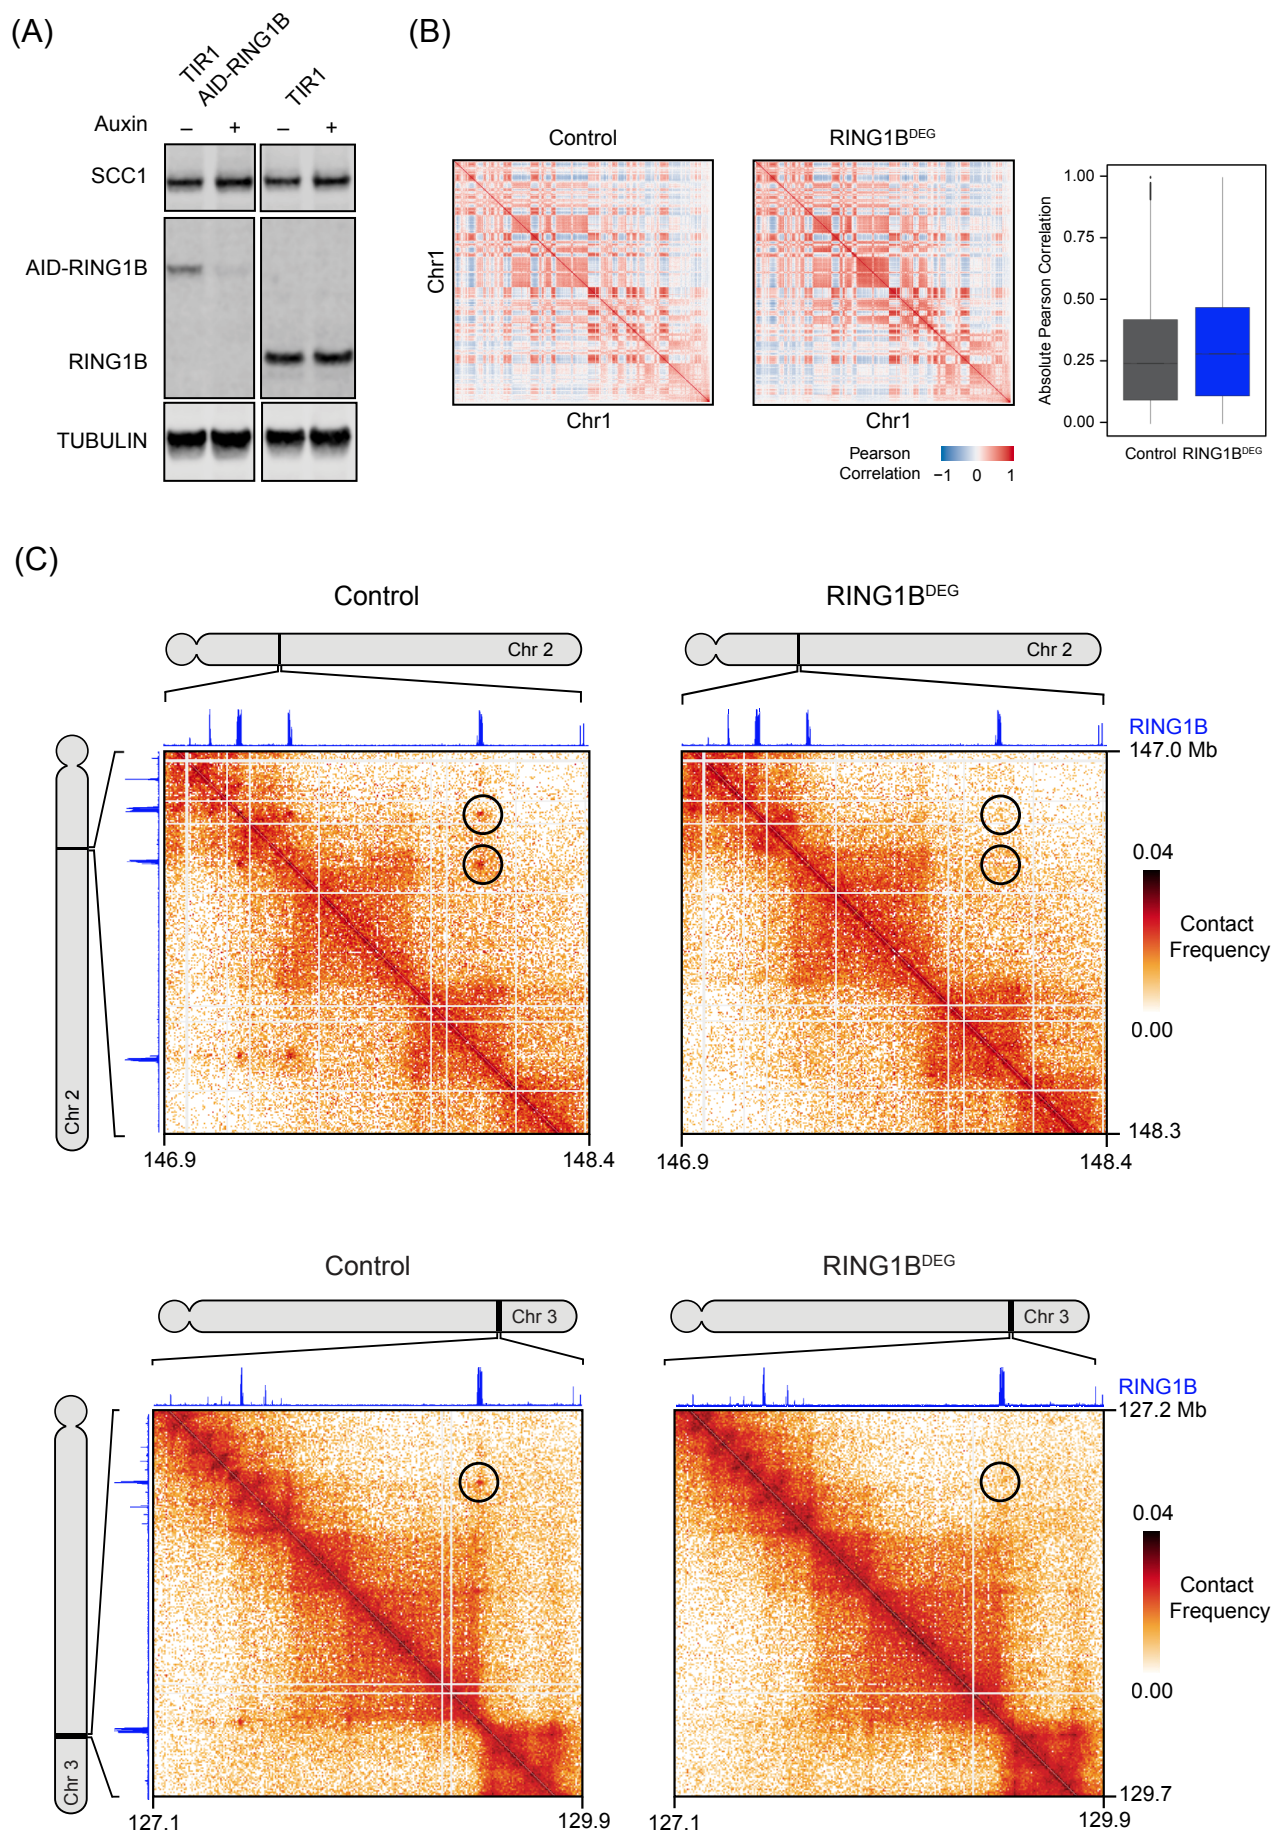

Figure S2

### **Supplementary Figure 2 - Characterisation of RING1B<sup>DEG</sup> ESCs. Related to Figure 2**

(A) A representative western blot for SCC1 and RING1B in the Control and AID-RING1B cell lines  $\pm$  auxin. Tubulin is shown as a loading control.

(B) Pearson correlation coefficient of chromosome 1 from Control and RING1B<sup>DEG</sup> at 500 kb resolution (left). Bar plot of the genome-wide absolute Pearson correlation for Control and RING1B<sup>DEG</sup> (right).

(C) Hi-C in Control and RING1B<sup>DEG</sup> cells at two regions (top at 5 kb resolution and bottom at 10 kb resolution). Black circles indicate at interactions that persist in the absence of cohesin and RING1B ChIP-seq is displayed above and to the left of the matrices.

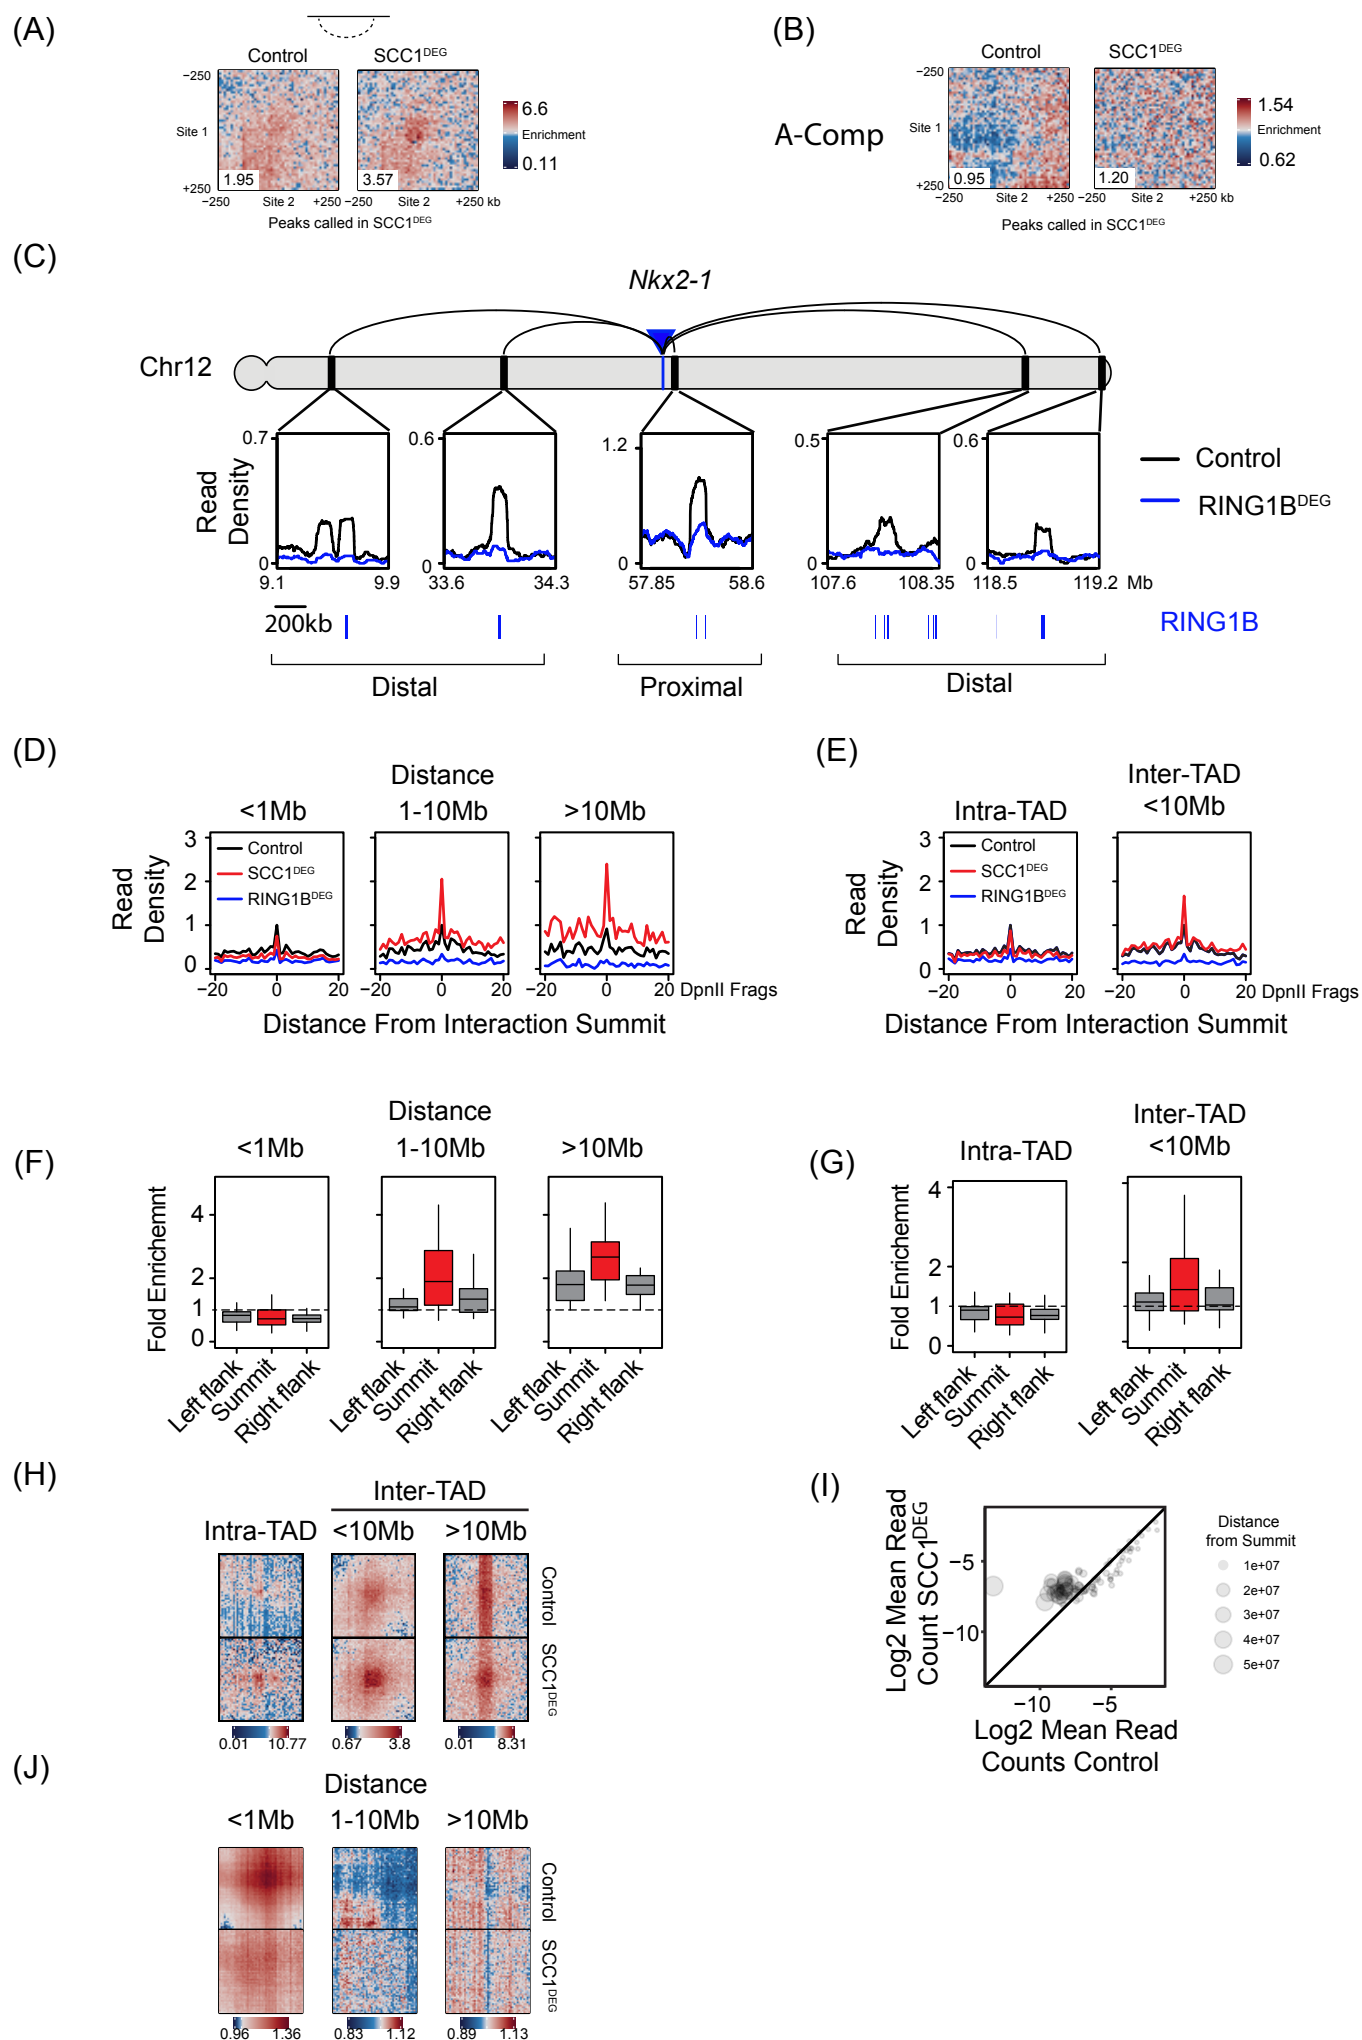

Figure S3

**Supplementary Figure 3 - Cohesin removal strengthens long-range polycomb chromatin domain interactions. Related to Figure 3**

- (A) Aggregate analysis of Hi-C from Control and SCC1<sup>DEG</sup> cells at peaks that persist in the absence of cohesin and do not overlap with RING1B at either interacting site (n=49). In each aggregate plot the trimmed mean of the enrichment scores at the centre 50kb of the aggregated matrix is displayed in the bottom left corner as a quantification of enrichment.
- (B) Aggregate analysis of Hi-C from Control and SCC1<sup>DEG</sup> cells using randomly selected 100kb regions within A compartments which are distance and chromosome matched to peaks that persist in the absence of cohesin (n=336). In each aggregate plot the trimmed mean of the enrichment scores at the centre 50kb of the aggregated matrix is displayed in the bottom left corner as a quantification of enrichment.
- (C) Capture-C interaction profiles between the *Nkx2-1* promoter and selected proximal and distal RING1B-occupied sites in the Control and RING1B<sup>DEG</sup> cell lines. RING1B ChIP-seq peaks are shown as blue bars below. The location of the *Nkx2-1* promoter is indicated with a blue arrow/bar and the interactions sites as black bars on the chromosome. Read density corresponds to normalised reads in the capture averaged across 250 DpnII restriction fragments.
- (D) Aggregate Capture-C signal in the Control, SCC1<sup>DEG</sup> and RING1B<sup>DEG</sup> cells at interaction sites segregated based on distance from the capture site. Only interactions between polycomb target gene promoters and RING1B occupied sites present in SCC1<sup>DEG</sup> are shown. Read density was normalised to Control signal at the summit and the x-axis illustrates the distance from the interaction site in DpnII fragments.
- (E) As in (D) but interactions are segregated based on intra- or inter-TAD location.
- (F) Fold enrichment of Capture-C signal in SCC1<sup>DEG</sup> over the Control cell line for signal in the peak summit (red) and flanks (grey), segregated based on distance as in (D). The left flank corresponds to a promoter-distal region, 80-100 DpnII fragments away from the summit. The right flank corresponds to a promoter-proximal region, 80-100 DpnII fragments away from the summit. Enrichment in the flanks shows average enrichment across 20 DpnII fragments. Boxplots show median and the interquartile range. Dotted line: fold enrichment of 1 (= no enrichment).
- (G) As in (F) but segregated based on intra- or inter-TAD location.
- (H) Aggregate analysis of Hi-C from Control and SCC1<sup>DEG</sup> cells at interactions that persist in the absence of cohesin. Interactions are divided into those that occur between loci within a TAD (intra-TAD) and between loci that are in different TADs either separated by less than or more than 10Mb.
- (I) Mean normalised read Capture-C counts in the Control and SCC1<sup>DEG</sup> cell lines for interactions between polycomb target gene promoters and RING1B occupied sites. Circle size indicates the distance between promoter and interactions sites.
- (J) Aggregate peak analysis of Hi-C for interactions between repressed but not polycomb occupied TSSs in mESCs. Interactions were segregated based on distance as indicated above the aggregate plots.



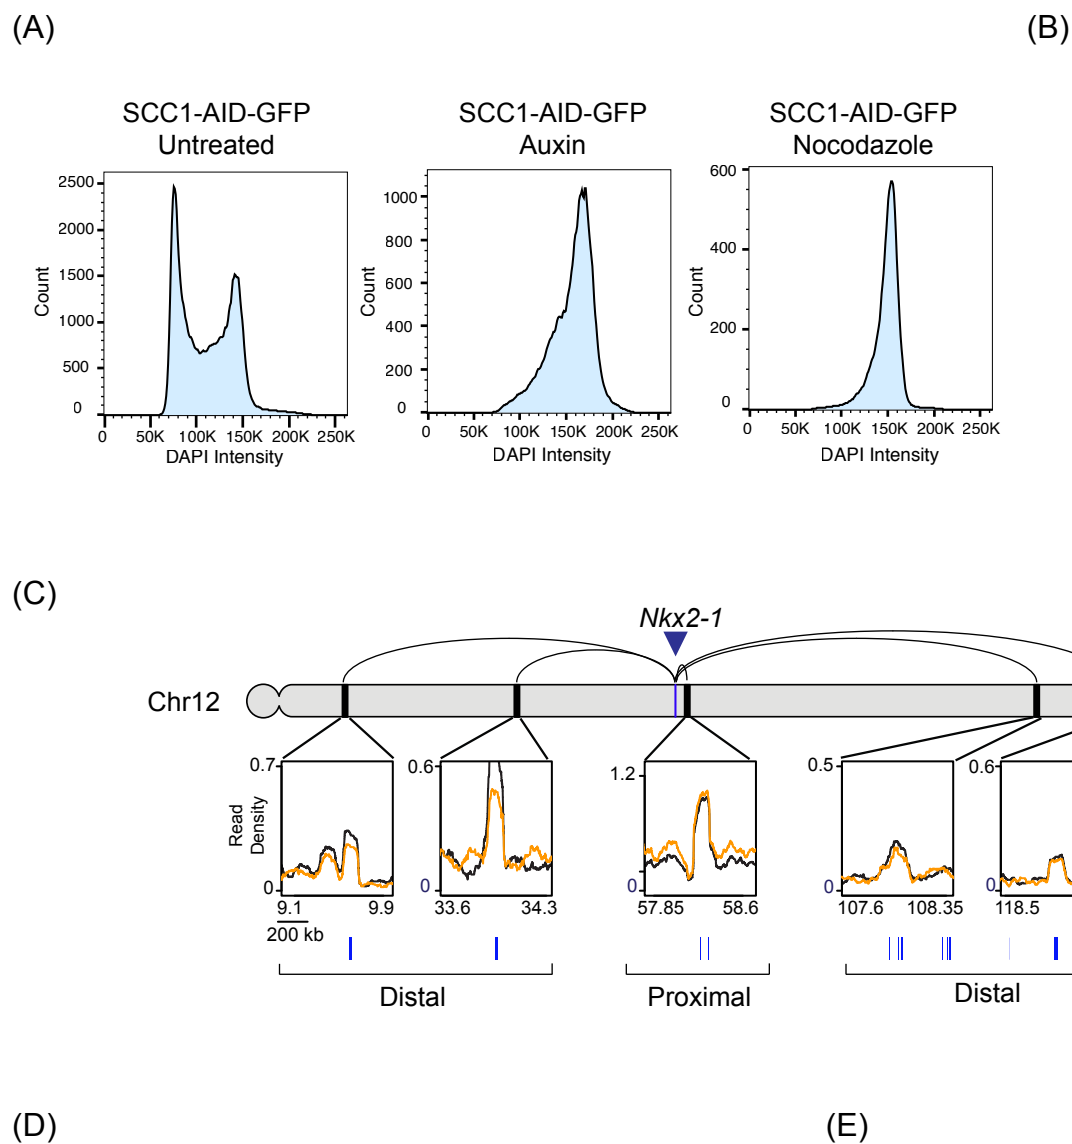

Figure S4

**Supplementary Figure 4 – Increased interaction between polycomb chromatin domains is not due to altered cell cycle distribution. Related to Figure 3**

(A) Cell cycle distribution of SCC1-AID-GFP cells either untreated (left), or treated with Auxin (middle) or Nocodazole (right) for six hours.

(B) Percentage mitotic cells as assessed by histone H3 serine 10 phosphorylation (H3S10P) positive cells in FACS for conditions indicated in (A)(n=3).

(C) Capture-C interaction profiles between the *Nkx2-1* promoter and selected proximal and distal RING1B-occupied sites in untreated (black) or Nocodazole treated (orange) Tir1 ESC line. RING1B ChIP-seq peaks are shown as blue bars below. The location of the *Nkx2-1* promoter is indicated with a blue arrow/bar and the interactions sites as black bars on the chromosome. Read density corresponds to normalised reads in the capture averaged across 250 DpnII restriction fragments.

(D) Aggregate Capture-C signal in untreated (black) or Nocodazole treated (orange) Tir1 ESC line at interaction sites segregated based on distance from the capture site. Only interactions between polycomb target gene promoters and RING1B occupied sites present in SCC1<sup>DEG</sup> are shown. Read density was normalised to Control signal at the summit and the x-axis illustrates the distance from the interaction site in DpnII fragments.

(E) As in (D) but segregated based on intra- or inter-TAD location.

(A)

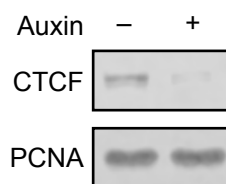

(B)

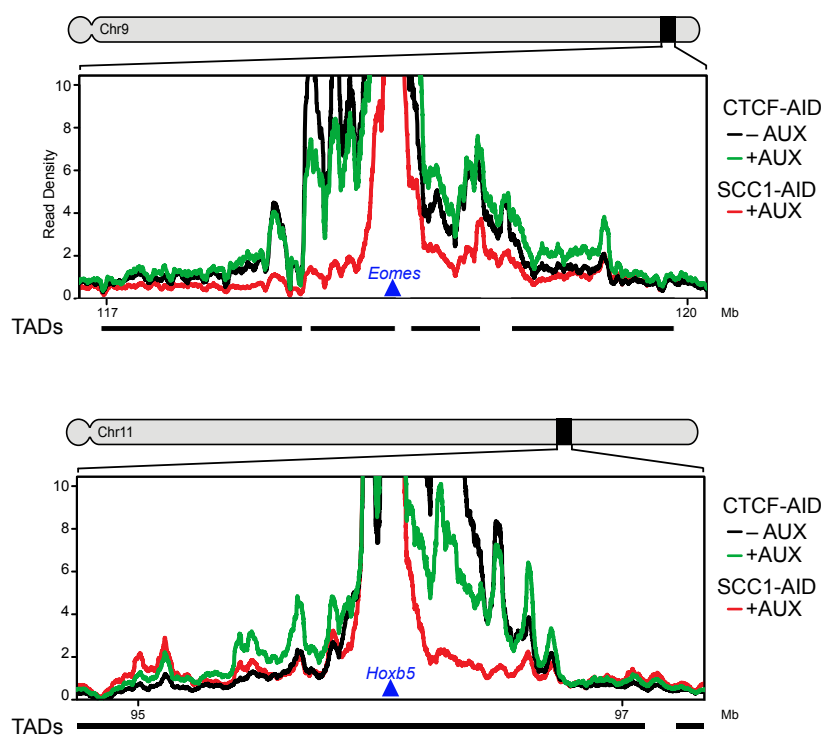

(C)

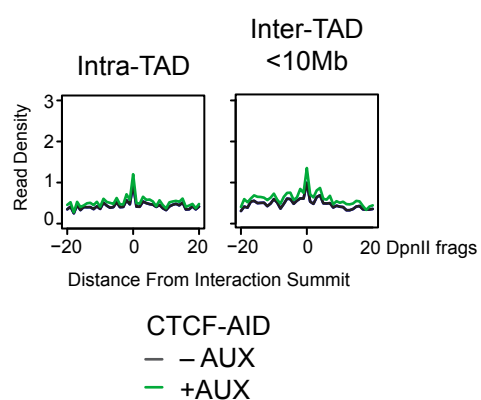

(D)

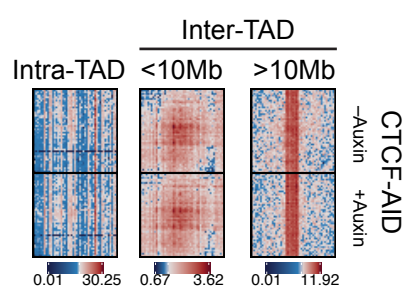

(E)

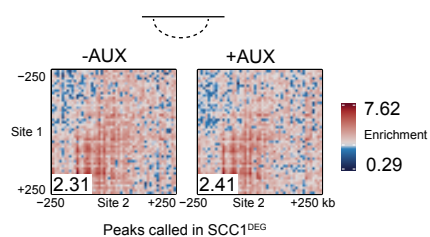

Figure S5

**Supplementary Figure 5 - Cohesin counteracts polycomb chromatin domain interactions independently of CTCF and insulation. Related to Figure 5**

(A) A representative western blot for CTCF in the CTCF-AID cell lines  $\pm$  auxin. PCNA is shown as a loading control.

(B) Capture-C signal around *Eomes* and *Hoxb5* gene promoters. Shown are normalized read densities for CTCF-AID  $\pm$  AUX (green and black, respectively) and as comparison for SCC1<sup>DEG</sup> (red). Read density corresponds to normalised reads in the capture averaged across 80 DpnII restriction fragments. View point is indicated as a blue triangle. TAD boundaries are shown below.

(C) Aggregate Capture-C signal in the CTCF-AID-GFP cells  $\pm$  auxin at interactions that persist in the absence of cohesin segregated based on TAD identity. Only interactions between polycomb target gene promoters and RING1B occupied sites present in SCC1<sup>DEG</sup> are shown. Read density was normalised to signal at the summit in CTCF-AID-GFP cells without auxin and the x-axis illustrates the distance from the interaction site in DpnII fragments.

(D) Aggregate analysis of Hi-C from CTCF-AID cells  $\pm$  auxin at peaks that persist in the absence of cohesin (n=336). Interactions are divided into those that occur between loci within a TAD (intra-TAD), between loci that are in different TAD and are separated by less than 10 Mb (inter TAD <10 Mb) and between loci that are in different TADs and are separated by more than 10 Mb (inter TAD >10 Mb).

(E) Aggregate analysis of Hi-C from CTCF-AID  $\pm$  auxin cells (Nora et al., 2017) at peaks that persist in the absence of cohesin and do not overlap with RING1B at either interacting site (n=49).

(A)

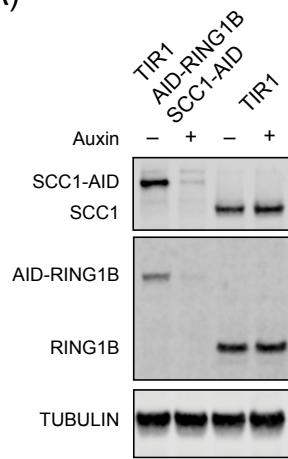

(B)

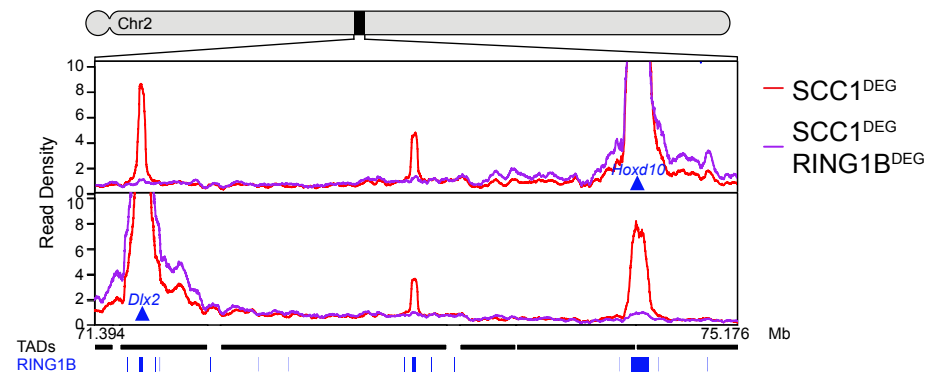

(C)

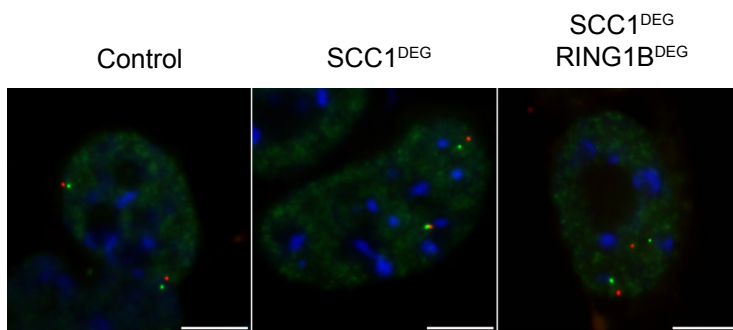

(D)

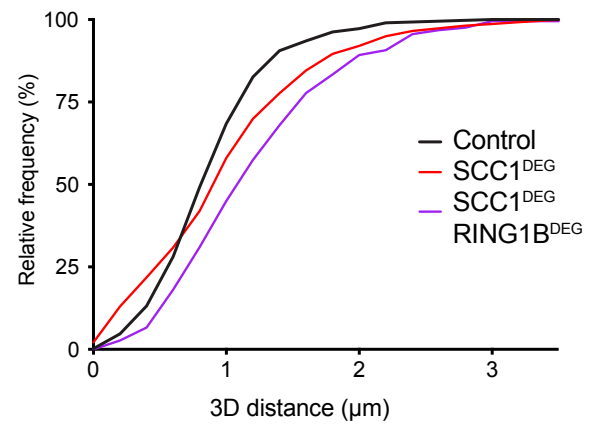

Figure S6

**Supplementary Figure 6 - Polycomb chromatin domain interactions are disrupted by cohesin. Related to Figure 6.**

- (A) A representative western blot for SCC1 and RING1B in the TIR1 and AID-RING1B SCC1-mAID-GFP cell lines  $\pm$  auxin. Tubulin is shown as a loading control.
- (B) Capture-C interaction profiles from *Hoxd10* (top) and *Dlx2* (bottom) viewpoints in Control and SCC1<sup>DEG</sup> RING1B<sup>DEG</sup> cell lines. RING1B ChIP-Seq peaks are displayed as blue bars and TAD intervals are as black bars.
- (C) Representative *Hoxd10* (red) *Dlx2* (green) RASER-FISH images from the indicated cell lines. Scale bar = 5  $\mu$ m.
- (D) Cumulative frequency distribution of 3D distance measures between *Hoxd10* and *Dlx2* in the indicated cell lines. Measurements as in Figure 5C.

(A)

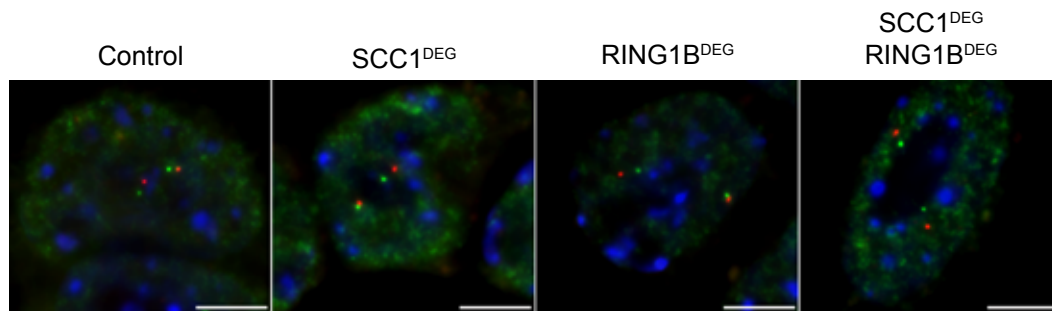

(B)

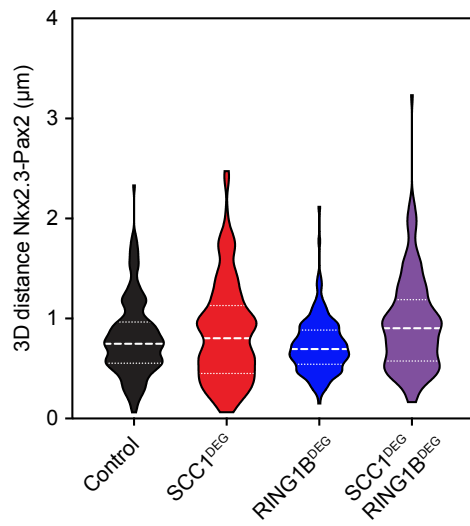

(C)

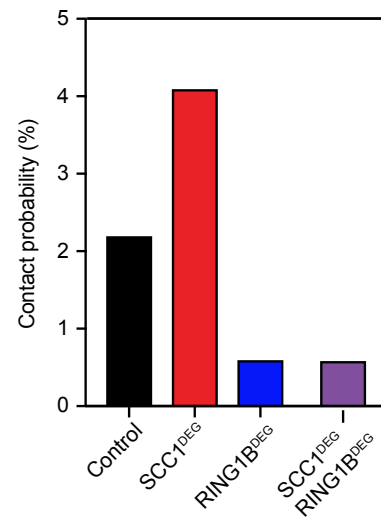

(D)

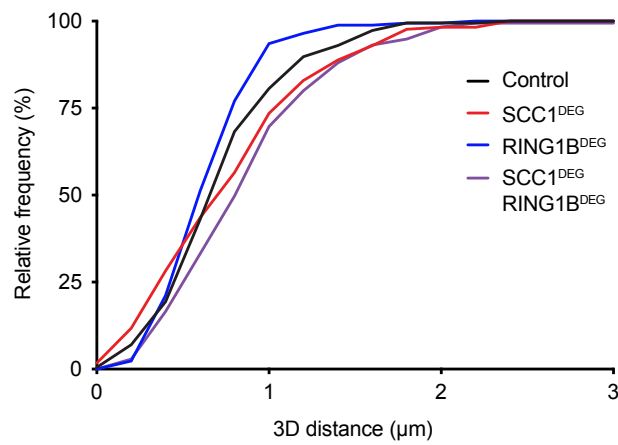

Figure S7

**Supplementary Figure 7 - Polycomb chromatin domain interactions are disrupted by cohesin. Related to Figure 6**

(A) Representative RASER-FISH images illustrating the *Nkx2-3* (green) and *Pax2* (red) loci. Scale bar is 5  $\mu$ m.

(B) Violin plots showing 3D distance measurements between *Nkx2-3* and *Pax2* in the indicated cells lines. The dashed lines show the median and interquartile range of between n=170-186 alleles for each cell line.

(C) Absolute contact probabilities showing the percent of signals judged as colocalised from observations in (B) (see Methods).

(D) Cumulative frequency distribution of 3D distance measures between *Nkx2-3* and *Pax2* in the indicated cells lines. Measurements as in (B).



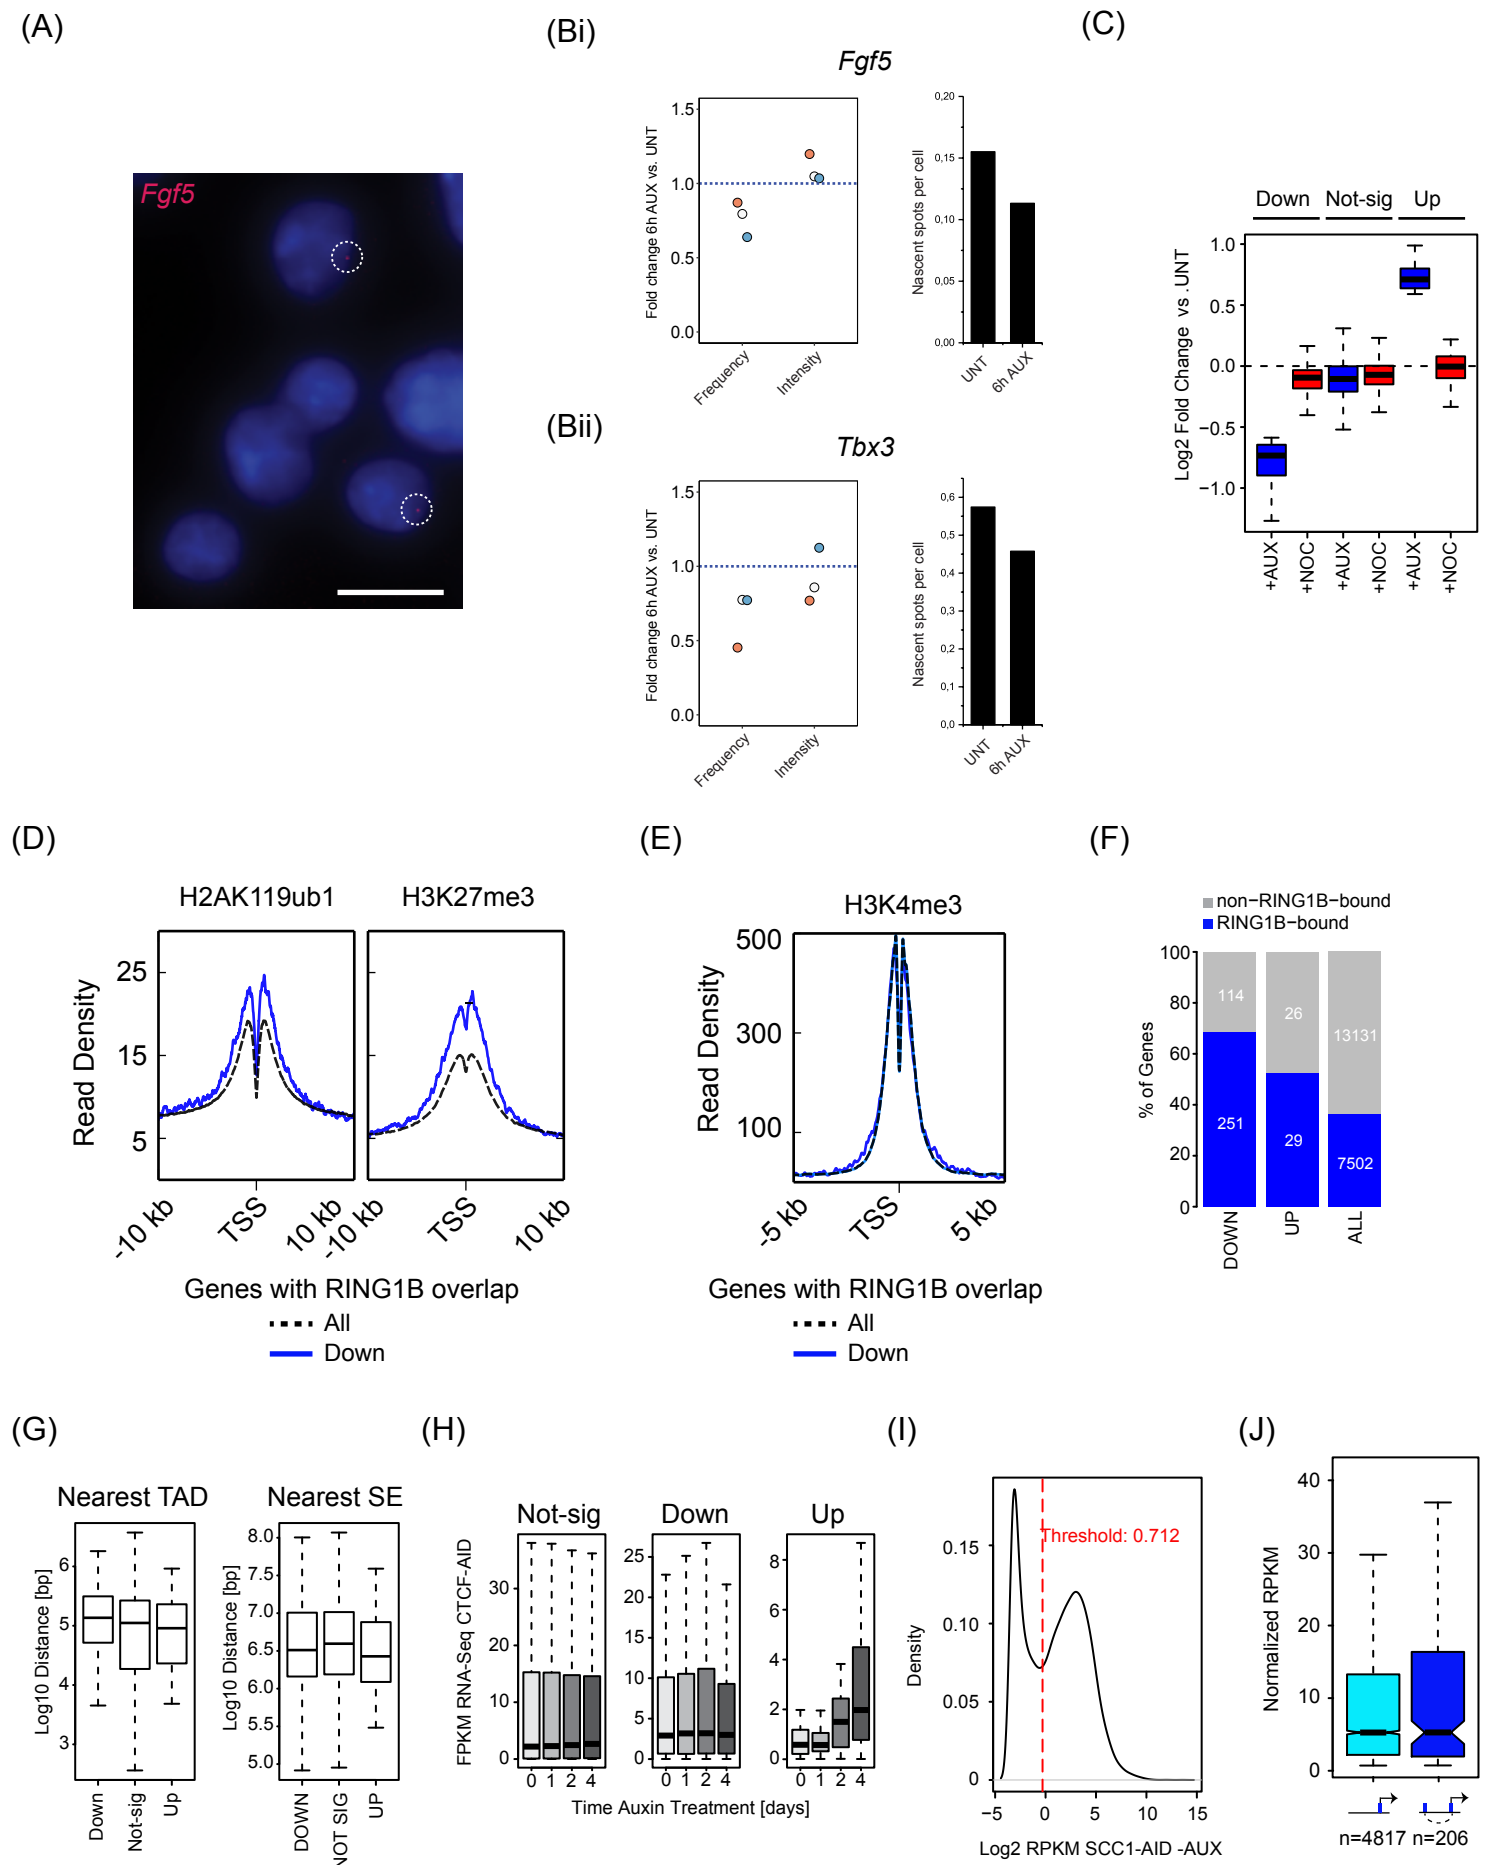

Figure S8

**Supplementary Figure 8 - Increased polycomb chromatin domain association in the absence of cohesin suppresses gene expression. Related to Figure 7**

A) Fluorescence microscopy image of ESCs labelled with DAPI (blue) and nascent RNA-FISH for *Fgf5* gene (red). Scale bar corresponds to 10  $\mu$ m. Dashed circles indicate active *Fgf5* alleles positive for RNA-FISH signal.

(B) Frequency and intensity of signals depicted in (A) highlighting transcriptionally active alleles have been measured for *Fgf5* and *Tbx3* and are presented in (Bi) and (Bii), respectively. (Left) A comparison of the frequency and intensity of RNA-FISH spots following depletion of cohesin. The individually coloured dots correspond to triplicate experiments. (Right) Bar-plots indicate the absolute frequency of active alleles in the cell population prior to and after cohesin removal for biological triplicates. Approximately 1000 cells have been measured in each biological replicate and condition.

(C) Box plots illustrating log<sub>2</sub> fold gene expression changes from cRNA-seq analysis of genes that are down, not significantly, or up-regulated following depletion of SCC1. The expression changes in the SCC1<sup>DEG</sup> cells are indicated as +AUX (blue) and expression changes in cells treated with nocodazole are indicated as +NOC (red).

(D) H2AK119ub1 and H3K27me3 ChIP-seq metaplots at the promoters of all genes that overlap with RING1B peaks (dashed-black line) or RING1B peaks that are associated with a reduction (blue line) in gene expression.

(E) As (D) but for H3K4me3.

(F) RING1B binding (+/- 1kb from the TSS, blue bars) at gene promoters that show reductions in gene expression following cohesin removal (left) compared to genes that show an increase in gene expression (middle) and all genes (right).

(G) Log<sub>10</sub> distance in base pairs to the nearest TAD border (left) or nearest super-enhancer in a different TAD (right) for genes that are downregulated, not significantly affected, or upregulated upon cohesin depletion.

(H) Expression of upregulated (right), downregulated (middle) or not significantly affected (left) in CTCF-AID cell line (Nora et al., 2017). Duration of auxin treatment in days is indicated below the boxplots.

(I) Density distribution of Log<sub>2</sub> transformed RPKM of transcripts in untreated Scc1-mAID cells. Note the bimodal distribution. Red line marks the threshold (RPKM=0.712) to distinguish expressed from unexpressed genes.

(J) Boxplots show transcriptional levels in untreated SCC1-mAID-GFP. Transcription is shown for expressed genes with RING1B-occupied promoters that either have no detectable Hi-C interactions in SCC1-AID cells treated with auxin (light blue), or interact with other sites that are RING1B occupied (dark blue). Numbers of genes in each group are indicated below the x-axis.

Wild type

No Cohesin

No PRC1

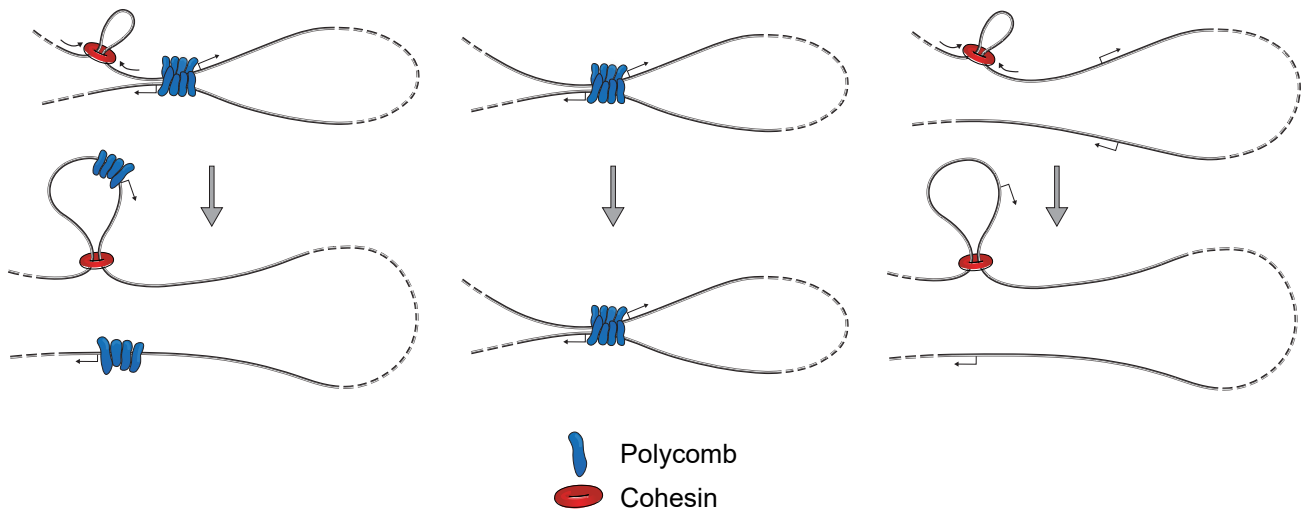

Figure S9

**Supplementary Figure 9 – A model for disruption of polycomb chromatin domain interactions by cohesin and loop extrusion. Related to Figures 1-7**

Polycomb chromatin domains (blue) can interact even when separated by large distances on the chromosome. Cohesin (red circle) can load onto DNA and has been proposed to extrude chromatin. As loop extrusion proceeds it will encounter one of the two interacting polycomb chromatin domains. We propose that the manner in which chromatin is extruded through cohesin could lead to the individualisation of these two previously interacting polycomb chromatin domains and explain the observed effect that cohesin removal has on polycomb chromatin domain interaction in our chromosome conformation capture and single-cell imaging experiments. A key prediction of this model would be that cohesin loading and extrusion near either interacting polycomb chromatin domain would lead to the observed effect.

**Supplementary Table 1. Datasets analysed in this study. Related to Figures 1, 4 and 5**

| Name                 | Reference                                   | GEO       |
|----------------------|---------------------------------------------|-----------|
| CDK8 ChIP-Seq        | Dimitrova_and_Klose_Elife_2018              | GSE98756  |
| RING1B ChIP-Seq      | Blackledge_and_Klose_Cell_2014              | GSE55698  |
| SUZ12 ChIP-Seq       | Blackledge_and_Klose_Cell_2014              | GSE55698  |
| H3K27me3 ChIP-Seq    | Blackledge_and_Klose_Cell_2014              | GSE55698  |
| EZH2 ChIP-Seq        | Blackledge_and_Klose_Cell_2014              | GSE55698  |
| FBXL19-FS2 ChIP-Seq  | Dimitrova_and_Klose_Elife_2018              | GSE98756  |
| H3K4me1 ChIP-Seq     | Whyte_and_Young_Nature_2012                 | GSE27844  |
| CTCF ChIP-Seq        | mouse ENCODE (LICR)                         |           |
| ESRRB ChIP-Seq       | Chen_and_Ng_Cell_2008                       | GSE11431  |
| KLF4 ChIP-Seq        | Chen_and_Ng_Cell_2008                       | GSE11431  |
| NANOG ChIP-Seq       | Whyte_and_Young_Cell_2013                   | GSE44288  |
| OCT4 ChIP-Seq        | Whyte_and_Young_Cell_2013                   | GSE44288  |
| SOX2 ChIP-Seq        | Whyte_and_Young_Cell_2013                   | GSE44288  |
| YY1 ChIP-Seq         | Sigova_and_Young_Science_2015               | GSE68195  |
| p300 ChIP-Seq        | mouse ENCODE                                |           |
| CDK8 ChIP-Seq        | Whyte_and_Young_Cell_2013                   | GSE44288  |
| CDK9 ChIP-Seq        | Whyte_and_Young_Cell_2013                   | GSE44288  |
| MED1 ChIP-Seq        | Whyte_and_Young_Cell_2013                   | GSE44288  |
| MED12 ChIP-Seq       | Whyte_and_Young_Cell_2013                   | GSE44288  |
| MED1 ChIP-Seq        | Sun_and_Carey_MolCell_2018                  | GSE115340 |
| MED12 ChIP-Seq       | Sun_and_Carey_MolCell_2018                  | GSE115340 |
| H3K27ac ChIP-Seq     | Whyte_and_Young_Nature_2012                 | GSE27844  |
| H3K36me3 ChIP-Seq    | Brookes_and_Pombo_CellStemCell_2012         | GSE34520  |
| H3K9ac ChIP-Seq      | mouse ENCODE                                |           |
| H3K4me3 ChIP-Seq     | Brown_and_Klose_CellReports_2017            | GSE93538  |
| SET1A.T7 ChIP-Seq    | Brown_and_Klose_CellReports_2017            | GSE93538  |
| MLL2.N.GFP ChIP-Seq  | Denissov_and_Stewart_Development_2014       | GSE52071  |
| CFP1 ChIP-Seq        | Brown_and_Klose_CellReports_2017            | GSE93538  |
| POLII_S7P ChIP-Seq   | Brookes_and_Pombo_CellStemCell_2012         | GSE34520  |
| POLII_S5P ChIP-Seq   | Brookes_and_Pombo_CellStemCell_2012         | GSE34520  |
| POLII_S2P ChIP-Seq   | Brookes_and_Pombo_CellStemCell_2012         | GSE34520  |
| POLII_8WG16 ChIP-Seq | Brookes_and_Pombo_CellStemCell_2012         | GSE34520  |
| TCF3 ChIP-Seq        | Marson_and_Young_Cell_2008                  | GSE11724  |
| NeuroD1 ChIP-Seq     | Pataskar_and_Tiwari_EmboJ_2016              | GSE65072  |
| TBX3 ChIP-Seq        | Kartikasari_and_Bhushan_EmboJ_2013          | GSE44764  |
| ZFP143 ChIP-Seq      | Ngondo-Mbongo_and_Carbon_NAR_2013           | GSE39263  |
| GABPA ChIP-Seq       | Savic_and_Myers_GenomeResearch_2015         | GSE72082  |
| FOXD1.FLAG ChIP-Seq  | Respuela_and_Radalglesias_CellStemCell_2016 | GSE70547  |
| FOXD1.HA ChIP-Seq    | Respuela_and_Radalglesias_CellStemCell_2016 | GSE70547  |
| POU3F1 ChIP-Seq      | Song_and_Jing_GenomData_2015                | GSE69865  |
| Nur77 ChIP-Seq       | Terranova_and_Stachowiak_PlosOne_2015       | GSE65698  |
| TEX10.FLAG ChIP-Seq  | Ding_and_Wang_CellStemCell_2015             | GSE66736  |
| FGFR ChIP-Seq        | Terranova_and_Stachowiak_PlosOne_2015       | GSE65698  |
| RXRa ChIP-Seq        | Terranova_and_Stachowiak_PlosOne_2015       | GSE65698  |

|                                      |                                            |            |
|--------------------------------------|--------------------------------------------|------------|
| PREP1 ChIP-Seq                       | Laurent_and_Penkov_PlosOne_2015            | GSE63282   |
| UTF1.Biotin ChIP-Seq                 | Galonska_and_Meissner_StemCellReports_2014 | GSE53768   |
| UTF1 ChIP-Seq                        | Galonska_and_Meissner_StemCellReports_2014 | GSE53768   |
| RONIN ChIP-Seq                       | Hnisz_and_Young_Cell_2013                  | GSE51522   |
| NR5A2.HA ChIP-Seq                    | Heng_and_Ng_CellStemCell_2010              | GSE19019   |
| ZFX ChIP-Seq                         | Chen_and_Ng_Cell_2008                      | GSE11431   |
| STAT3 ChIP-Seq                       | Chen_and_Ng_Cell_2008                      | GSE11431   |
| TCFCP2I1 ChIP-Seq                    | Chen_and_Ng_Cell_2008                      | GSE11431   |
| SMAD1 ChIP-Seq                       | Chen_and_Ng_Cell_2008                      | GSE11431   |
| nMYC ChIP-Seq                        | Chen_and_Ng_Cell_2008                      | GSE11431   |
| E2F1 ChIP-Seq                        | Chen_and_Ng_Cell_2008                      | GSE11431   |
| cMYC ChIP-Seq                        | Chen_and_Ng_Cell_2008                      | GSE11431   |
| REST ChIP-Seq                        | Whyte_and_Young_Cell_2013                  | GSE44288   |
| MAX ChIP-Seq                         | Krepelova_and_Oliviero_PlosOne_2014        | GSE48175   |
| H3K9me3 ChIP-Seq                     | BulutKarslioglu_and_Jenuwein_MolCell_2014  | GSE57092   |
| H2Aub1 ChIP-Seq                      | Brookes_and_Pombo_CellStemCell_2012        | GSE34520   |
| H2A.Z ChIP-Seq                       | Surface_and_Boyer_CellRep_2016             | GSE53208   |
| BRG1.TAP ChIP-Seq                    | Dieuleveult_and_Gerard_Nature_2016         | GSE64825   |
| CHD1.TAP ChIP-Seq                    | Dieuleveult_and_Gerard_Nature_2016         | GSE64825   |
| CHD2.TAP ChIP-Seq                    | Dieuleveult_and_Gerard_Nature_2016         | GSE64825   |
| CHD4.TAP ChIP-Seq                    | Dieuleveult_and_Gerard_Nature_2016         | GSE64825   |
| CHD6.TAP ChIP-Seq                    | Dieuleveult_and_Gerard_Nature_2016         | GSE64825   |
| CHD8.TAP ChIP-Seq                    | Dieuleveult_and_Gerard_Nature_2016         | GSE64825   |
| CHD9.TAP ChIP-Seq                    | Dieuleveult_and_Gerard_Nature_2016         | GSE64825   |
| EP400.TAP ChIP-Seq                   | Dieuleveult_and_Gerard_Nature_2016         | GSE64825   |
| FAIRE-Seq                            | Dieuleveult_and_Gerard_Nature_2016         | GSE64825   |
| INO80 ChIP-Seq                       | Wang_and_Hu_CellStemCell_2014              | GSE49137   |
| MNase-Seq                            | West_and_Kingston_NatComm_2014             | GSE59064   |
| KDM2B ChIP-Seq                       | Blackledge_and_Klose_Cell_2014             | GSE55698   |
| HP1.GFP ChIP-Seq                     | BulutKarslioglu_and_Jenuwein_MolCell_2014  | GSE57092   |
| uH2A ChIP-Seq                        | Fursova_and_Klose_MolCell_2019             | GSE119620  |
| E14_Scc1-AID_AUX_RING1B              | This study                                 |            |
| E14_Tir1_AUX_RING1B                  | This study                                 |            |
| CTCF-AID +/- AUX Hi-C                | Nora_and_Bruneau_2017                      | GSE98671   |
| H3K27me3 ChIP-Seq, HCT116            | Rao_and_Lieberman-Aiden_2017               | GSM2809625 |
| EZH2 ChIP-Seq, HCT116                | ENCODE Consortium, 2012                    | GSM3498250 |
| H3K27me3 ChIP-Seq, HAP1              | Campagne_and_Margueron_2019                | GSE110143  |
| H2AK119ub ChIP-Seq, HAP1             | Campagne_and_Margueron_2019                | GSE110143  |
| H3K27me3 ChIP-Seq, HeLa              | ENCODE Consortium, 2012                    | GSM733696  |
| EZH2 ChIP-Seq , HeLa                 | ENCODE Consortium, 2012                    | GSM1003520 |
| H3K27me3 ChIP-Seq, adult mouse liver | Ren lab, ENCODE                            | GSM769034  |
| HCT116 Hi-C                          | Rao_and_Lieberman-Aiden_2017               | GSE104333  |

|                        |                           |           |
|------------------------|---------------------------|-----------|
| Mouse hepatocytes Hi-C | Schwarzer_and_Spitz_2017  | GSE93431  |
| HeLa Hi-C              | Wutz_and_Peters_2017      | GSE102884 |
| HAP1 Hi-C              | Haarhuis_and_Rowland_2017 | GSE95014  |
